# Supplementary material
Source: Springer Nature journal article supplement (https://www.springermedizin.de/resource/supplementary/12916_2009_268_MOESM2_ESM.pdf/9599692)

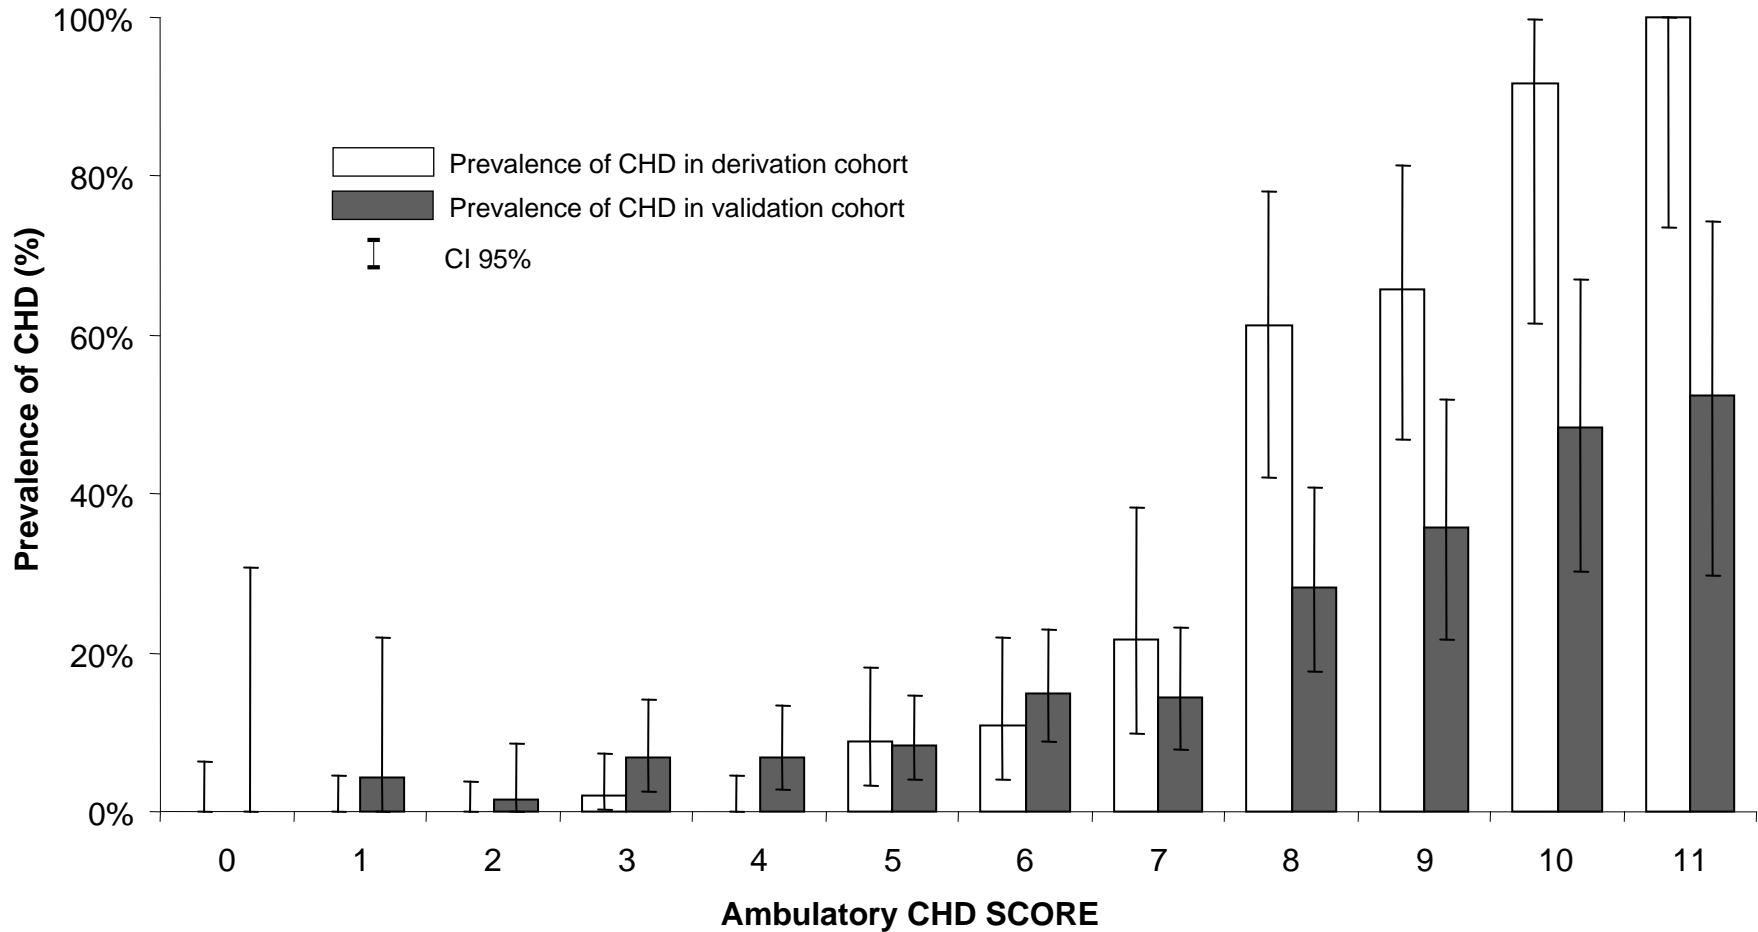

Supplement: MOESM2 [file 9599692]
